# Supplementary material
Source: Springer Nature journal article supplement (https://www.springermedizin.de/resource/supplementary/13019_2012_778_MOESM9_ESM.pdf/9639066)

**Figure 5c**  
**Sheep 2196:**

**Control**                      **Post procedure**                      **With external Support**

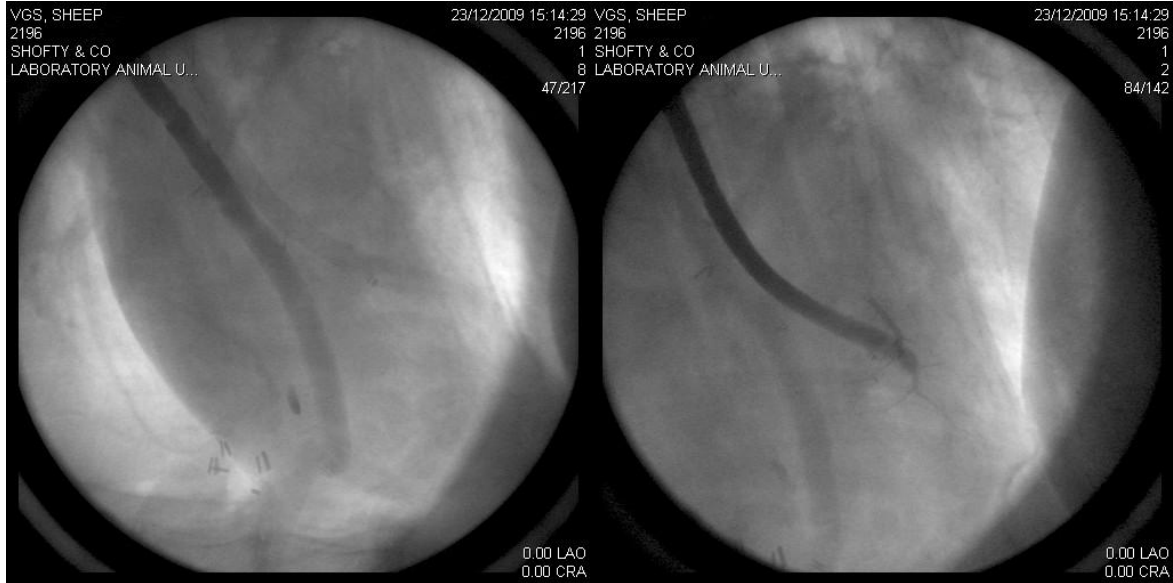

**After 12 weeks**

**Control**                      **With external support**

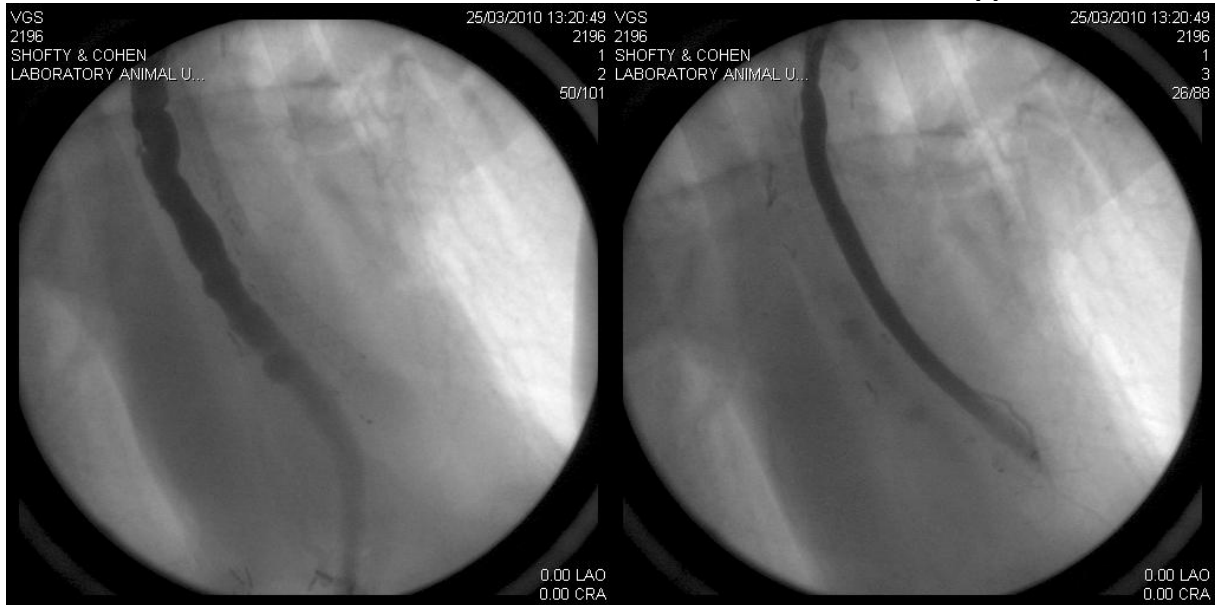

Supplement: MOESM9 [file 9639066]
